# Supplementary material for: Simultaneously Monitoring Whole Corneal Injury with Corneal Optical Density and Thickness in Patients Undergoing Cataract Surgery
Source: MDPI journal article supplement (doi:10.3390/diagnostics11091639), 2021-09-07
Supplement: s1 [file s1]

# Supplementary Materials

**Supplementary Table S1.** Preoperative quality assessment of Pentacam AxL® examination.

|                           | Number (Eye) | Percent |
|---------------------------|--------------|---------|
| OK                        | 46           | 61.3%   |
| AXL SNR Error             | 6            | 8.0%    |
| Lid closure !             | 6            | 8.0%    |
| Alignment (Z) Error       | 5            | 6.7%    |
| Blinking Error !          | 5            | 6.7%    |
| Unsteady Fixation         | 3            | 4.0%    |
| AXL SNR Error Single Peak | 2            | 2.7%    |
| AXL Align. (XY) Error     | 1            | 1.3%    |
| Data Gaps !               | 1            | 1.3%    |
| Total                     | 75           | 100.0%  |

**Supplementary Table S2.** Postoperative quality assessment of Pentacam AxL® examination.

|                             | Number (Eye) | Percent |
|-----------------------------|--------------|---------|
| OK                          | 50           | 66.7%   |
| Lid closure !               | 8            | 10.7%   |
| Alignment (Z) Error         | 4            | 5.3%    |
| Unsteady Fixation           | 4            | 5.3%    |
| Alignment (XY) Error        | 2            | 2.7%    |
| Blinking Error !            | 2            | 2.7%    |
| 3D Model Deviation !        | 2            | 2.7%    |
| AXL Align. (XY) Error       | 1            | 1.3%    |
| Data Gaps !                 | 1            | 1.3%    |
| Blinking Error/Nose Shadow! | 1            | 1.3%    |
| Total                       | 75           | 100.0%  |
